# Supplementary material for: Self-assembled lamellar structures with functionalized single wall carbon nanotubes
Source: Royal Society of Chemistry journal article supplement (doi:10.1039/b709499j), 2007-01-01
Supplement: b709499j.pdf [file b709499j.pdf]

## Supplementary Information

### Self-assembled lamellar structures with functionalized single wall carbon nanotubes

*Sanjib Bhattacharyya* <sup>\*(a)</sup>, *Jean-Paul Salvetat* <sup>(a)</sup>, *Debdulal Roy* <sup>(b)</sup>, *Vasile Heresanu* <sup>(c)</sup>,  
*Pascale Launois* <sup>(c)</sup>, *Marie-Louise Saboungi* <sup>\*(a)</sup>

**Experimental procedure:** In brief the experimental procedure is as follows: 10 mg of SWNTs are dispersed in 30 ml of 2.5 mM of aqueous SDS solution by sonication and then 10 mg of type I collagen solution (1mg/ml) is added to the dispersion and stirred overnight. After that the solution is sonicated for 15 minutes and the soluble part separated by centrifugation at 11000 rpm. This is then placed on different substrates such as glass, mica or silicon and water was slowly evaporated at 40-50 °C to form the film.

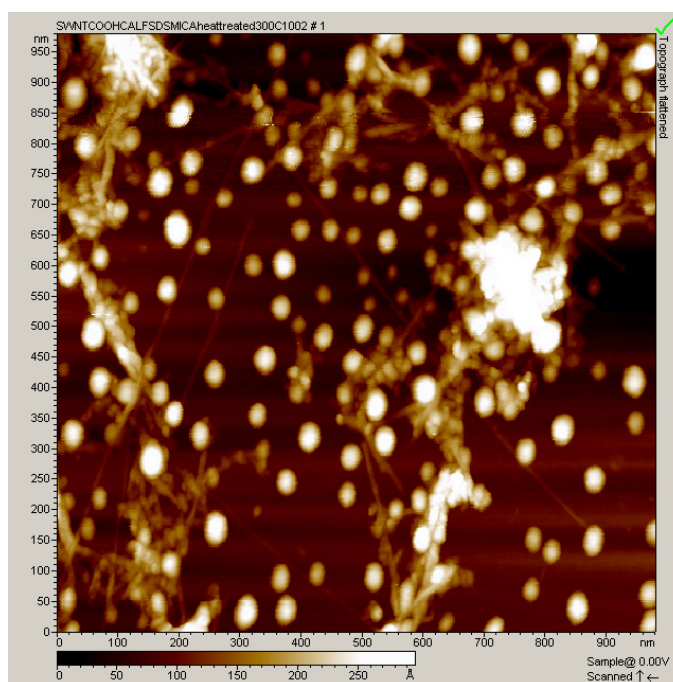

**AFM topograph of the multilayers film after calcination at 350 °C for 2 hours.**
